# Supplementary material for: Structural Basis for Substrate Specificity of Mammalian Neuraminidases
Source: PubMed Central journal article supplement (PMC4164519; doi:10.1371/journal.pone.0106320), 2014-09-15
Supplement: pone.0106320.s001.pdf [file pone.0106320.s001.pdf]

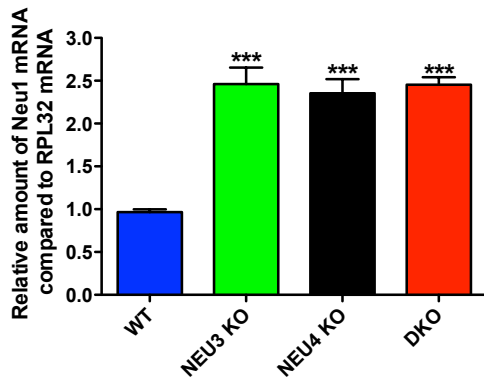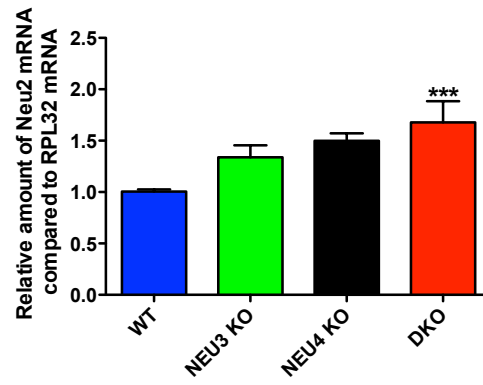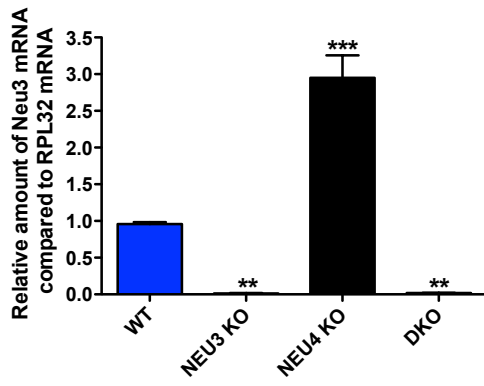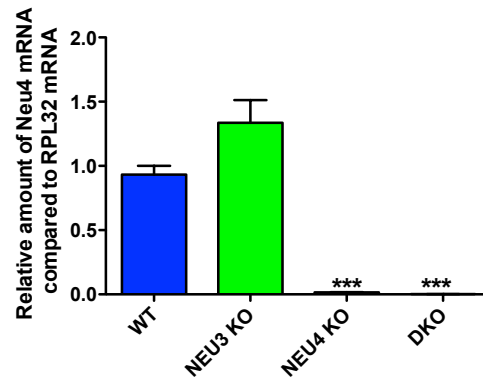

Figure S1.
